# Supplementary figures and images for: Maternal folic acid supplementation prevents autistic behaviors in a rat model induced by prenatal exposure to valproic acid
Source: Royal Society of Chemistry journal article supplement (doi:10.1039/d0fo02926b), 2021-01-01

**A**

### Social test

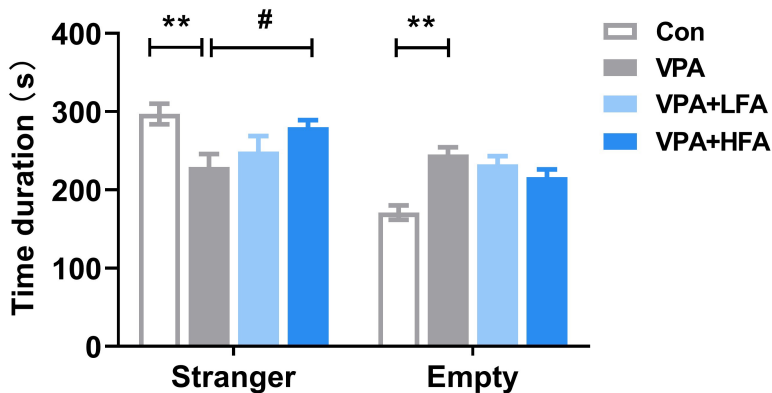

**B**

### Social preference test

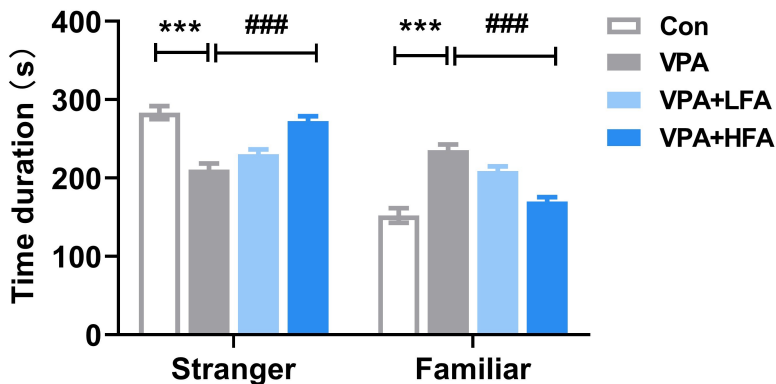

Supplement: d0fo02926b1.pdf [file d0fo02926b1.pdf]
